# Supplementary material for: Interferon-Inducible Cholesterol-25-Hydroxylase Inhibits Hepatitis C Virus Replication via Distinct Mechanisms
Source: PubMed Central journal article supplement — Sci Rep. 2014 Dec 3;4:7242. doi: 10.1038/srep07242 (PMC4252895; doi:10.1038/srep07242), 2014-12-03
Supplement: srep07242-s1.pdf [file srep07242-s1.pdf]

# Interferon-Inducible Cholesterol-25-Hydroxylase Inhibits Hepatitis C Virus

## Replication via Distinct Mechanisms

Yongzhi Chen<sup>1,2</sup>, Shanshan Wang<sup>3</sup>, Zhaohong Yi<sup>1</sup>, Huabin Tian<sup>1,2</sup>, Saba Aliyari<sup>4</sup>, Yanhua Li<sup>7</sup>,

Gang Chen<sup>7</sup>, Ping Liu<sup>1</sup>, Jin Zhong<sup>8</sup>, Xinwen Chen<sup>9</sup>, Peishuang Du<sup>1</sup>, Lishan Su<sup>1,5</sup>, F.

Xiao-Feng Qin<sup>3,6\*</sup>, Hongyu Deng<sup>1\*</sup>, Genhong Cheng<sup>1,4\*</sup>

From the <sup>1</sup>CAS Key Laboratory of Infection and Immunity, Institute of Biophysics, Chinese Academy of Sciences, Chaoyang District, Beijing, China.

<sup>2</sup>University of Chinese Academy of Sciences, Beijing, China.

<sup>3</sup>Key Laboratory of Gene Engineering of the Ministry of Education and State Key Laboratory for Biocontrol, School of Life Sciences, Sun Yat-Sen University, Guangzhou, 510275, China

<sup>4</sup>Department of Microbiology, Immunology and Molecular Genetics, University of California, Los Angeles, CA 90095, USA.

<sup>5</sup>Department of Microbiology and Immunology and Lineberger Comprehensive Cancer Center, University of North Carolina, Chapel Hill, NC27599, USA.

<sup>6</sup>Department of Immunology, The University of Texas MD Anderson Cancer Center, Houston, TX 77030, USA.

<sup>7</sup>Institute of Quality Standard and Testing Technology for Agro-products, CAAS

<sup>8</sup>Key Laboratory of Molecular Virology and Immunology, Institut Pasteur of Shanghai, Chinese Academy of Sciences, Shanghai, China.

<sup>9</sup>State Key Laboratory of Virology, Wuhan Institute of Virology, Chinese Academy of Sciences, Wuhan, China.

**IB: Anti-CH25H**

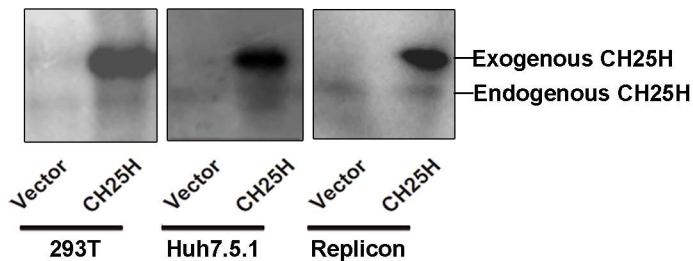

**Supplementary Figure 1: Western blotting was performed to detect the expression of the CH25H. 293T cells, Huh7.5.1 cells or Replicon cells were transfected with vector or HA-CH25H, after 36h, the cells were harvested and lysed, and then the whole cell extracts were subjected to western blotting.**

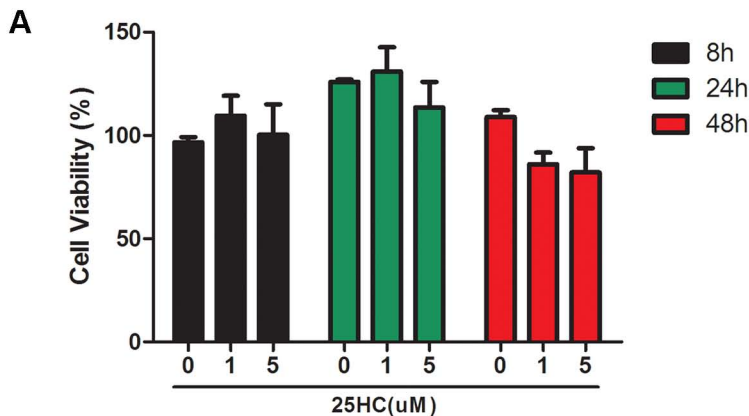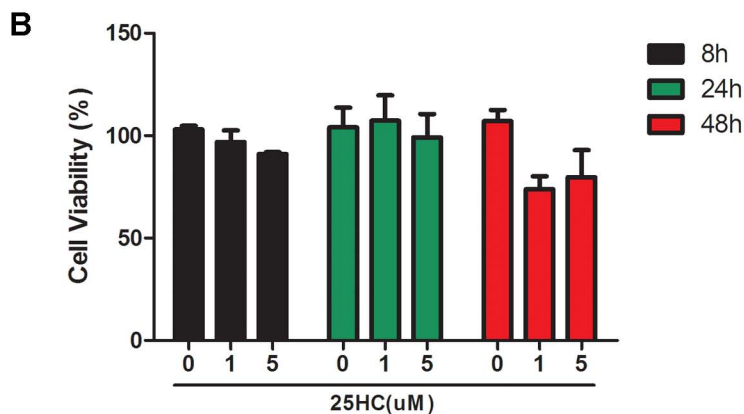

**Supplementary Figure 2: Effect of 25HC on Huh7.5.1 (A) and Replicon (B) cell viability.** Cells ( $5 \times 10^3$  cells/well) were first seeded into 96-well plates, incubated overnight and then treated with 25HC (0, 1, 5 $\mu$ M) for 8 h., 24h or 48h. As soon as the treatment was completed, 10  $\mu$ l of the Cell Counting Kit-8 reagent was added to each well, and the cells were incubated for 2 h at 37°C. Finally, the spectrophotometric absorbance of each sample was measured with a microplate reader at 450 nm.

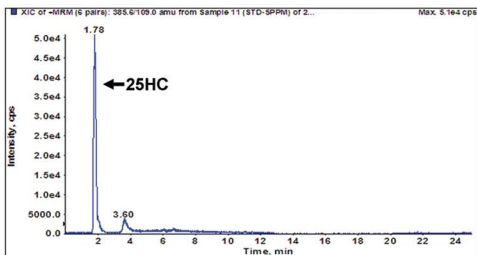

Standard

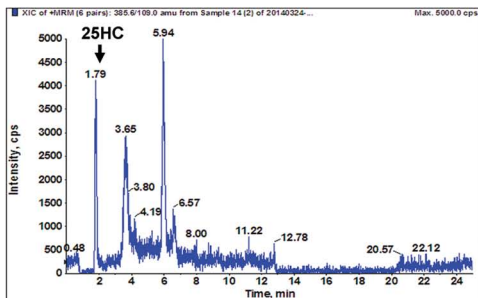

CH25H-WT

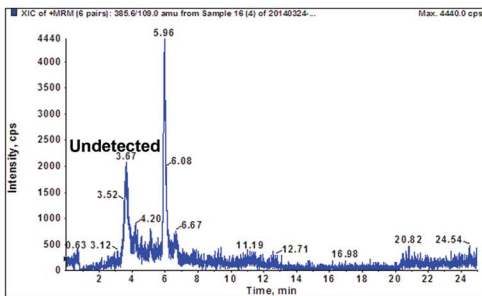

CH25H-M

**Supplementary Figure 3: Quantification of 25-Hydroxycholesterol in conditioned medium.** The cell culture medium were collected from HEK293T cells after 48h transfection with CH25H or CH25H-M, then were analyzed by LC-MS. Experiments were done twice independently with similar results obtained.

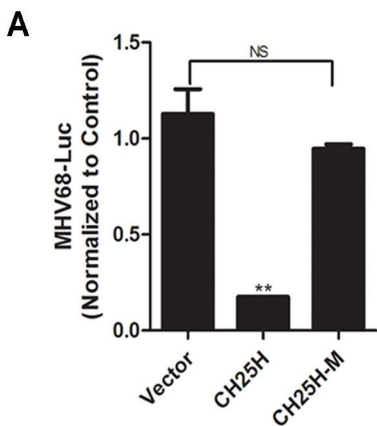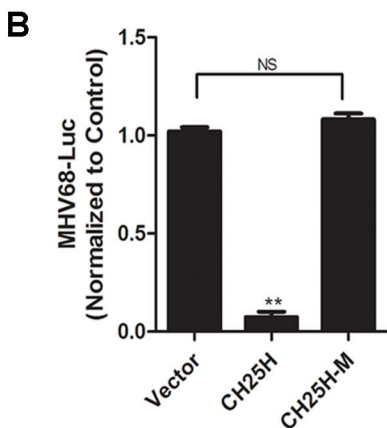

**Supplementary Figure 4: Effect of CH25H and CH25H-M on MHV-68 infection. HEK293T cells transfected with CH25H or CH25H-M were infected with MHV-68(M3FL). At approximately 24 hours post infection, the luciferase activity from HEK293T cells was measured (A), and the supernatant was transferred to fresh BHK21 and luciferase activity was measured at 9 hours after infection of BHK21 cells (B). All experiments were performed in triplicates and data shown are representative of three independent experiments with SEM indicated by error bars. \*\*P < 0.01.**

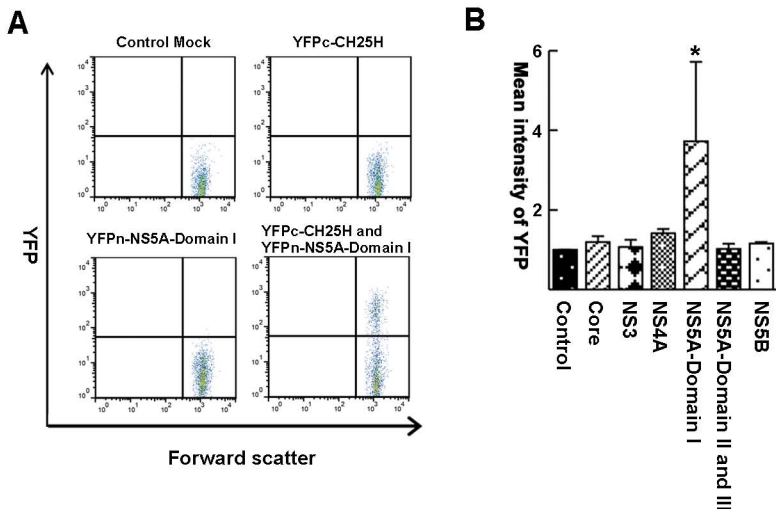

**Supplementary Figure 5: Flow cytometry analysis of the BiFC assays of CH25H and HCV encoded proteins. A:** 293T cells transiently co-transfected with YFPc-CH25H and YFPn-NS5A-Domain I. 27 hours later, cells were harvested for flowcytometry. Mock 293T or transfected with YFPc-CH25H or YFPn-NS5A-Domain I alone were used as negative controls. **B:** 293T cells transiently co-transfected with YFPc-CH25H and the expression vectors for YFPn tagged HCV proteins, then the analysis were performed as A. All experiments were performed in triplicates and data shown are representative of three independent experiments with SEM indicated by error bars. \*P < 0.05

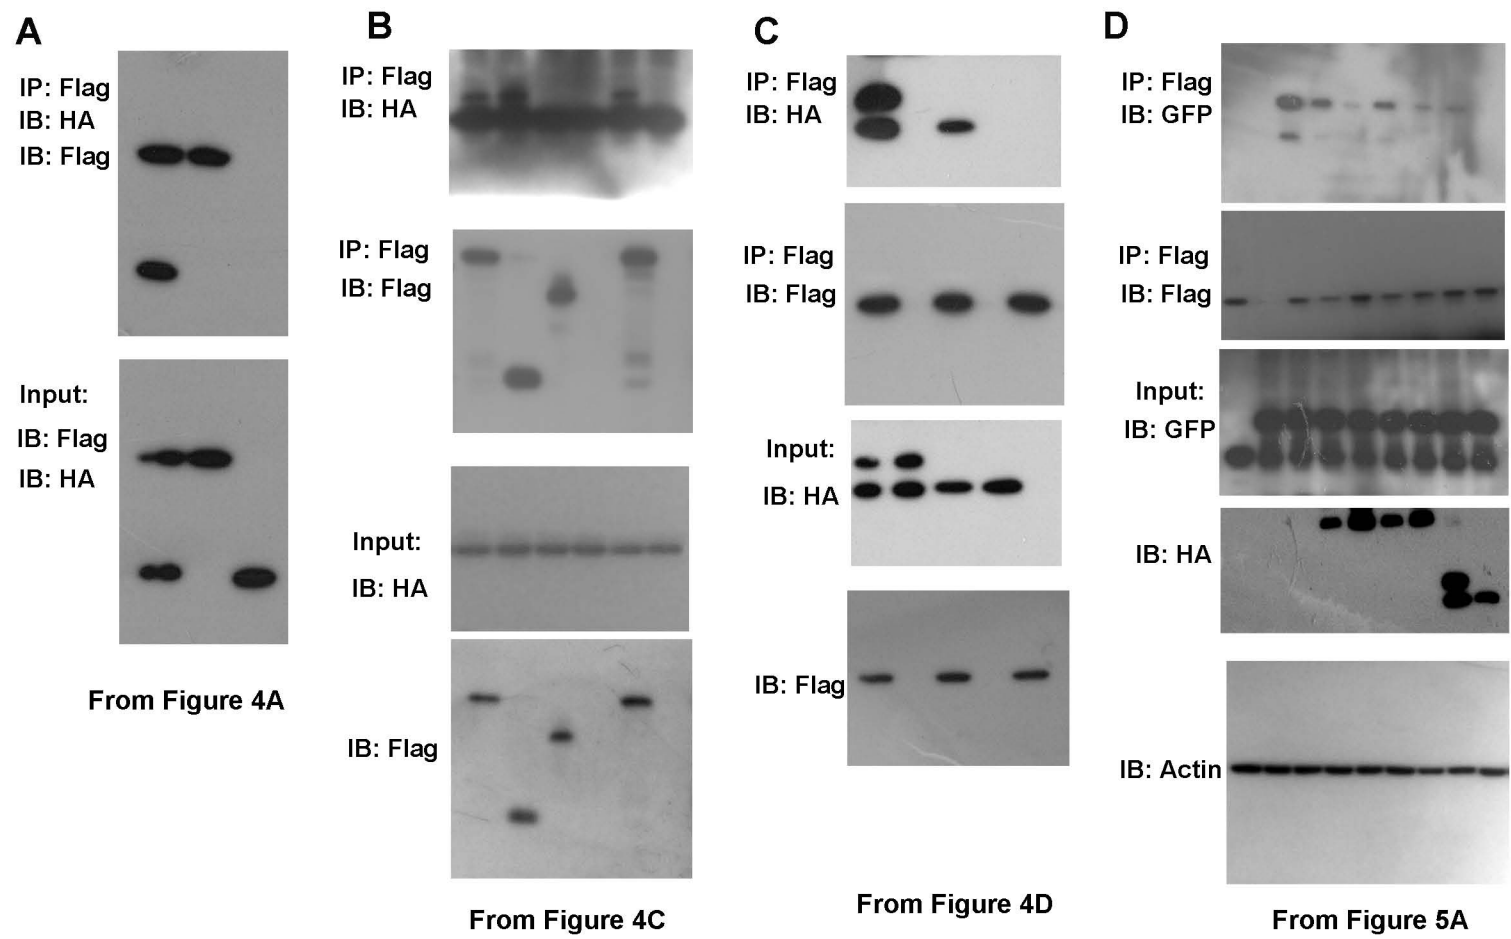

Supplementary Figure 6. Original panel for each western blot



**TABLE S1** Primers used for generation of target genes

| Gene               | Primer (5'-3')                                 |                                         |
|--------------------|------------------------------------------------|-----------------------------------------|
|                    | Forward                                        | Reverse                                 |
| CH25H              | AAAGA <u>ATT</u> CAAATGAGCTGCCACA <u>ACTGC</u> | AAAGG <u>TACCT</u> CACCGCGCTGGGACAGAT   |
| CH25H-TM           | AAAGA <u>ATT</u> CAAATGAGCTGCCACA <u>ACTGC</u> | AAAGG <u>TACCT</u> CAGAAGAGTAGCAGGCAGAA |
| CH25H-FA           | AAAGA <u>ATT</u> CAAGACATGGAGTTCTTCGTG         | AAAGG <u>TACCT</u> CACCGCGCTGGGACAGAT   |
| CH25H-M            | TGGTGCACCACGACCTGCAACAGTCTCACTTAA              | CTGTTGCAGGTCGTGGTGCACCACACCCCGTAC       |
| CH25H-entry        | CACCATGAGCTGCCACA <u>ACTG</u>                  | CCGCGCTGGGACAGATGCAGTC                  |
| NS5A               | CACCATGGGATCGTGGCTCCGCGACGTG                   | GGGGCTACAGGGAGTTATTAG                   |
| NS5A-Domain I      | CACCATGGGATCGTGGCTCCGCGACGTG                   | TGCGTCGGGCTCAGGTTAC                     |
| NS5A-Domain II/III | CACCATGGACGTATTGAGGTCCATGC                     | GGGGCTACAGGGAGTTATTAG                   |
| NS4A               | CACCATGTGCGTTTCCATCATCGGCCG                    | GCATTCTCCATCTCATC                       |

The underlined nucleotides indicate restriction sites, GAATTC for EcoRI and GGTACC for KpnI
